# Supplementary material for: Characterizing Features of Human Circulating B Cells Carrying CLL-Like Stereotyped Immunoglobulin Rearrangements
Source: Front Oncol. 2022 Jun 23;12:894419. doi: 10.3389/fonc.2022.894419 (PMC9275393; doi:10.3389/fonc.2022.894419)
Supplement: Supplementary file 5 [file Table_2.xlsx]

## Sheet: Table_2
Table 2	clonotypes can be shared in B cells with different phenotypes (e.s. CD5+ and CD5-); therefore, the sum of all the clonotypes from this table is higher than the total reported in the results
sample	subset	cd5	lregion	reads passing filters	Unique UMI	unique sequences	clonotypes	average VH mut (%)	#7H	#14	#64B	#3	#5	#28A	#59	#2	#1	#99	#202	#6	#12	#31	#77	#8	#201
BC01	DN	5N	K	551148	9137	4339	4339	4.2	NA	1	NA	NA	NA	NA	NA	2	NA	NA	NA	NA	NA	NA	NA	NA	NA
BC01	DN	5N	L	682464	17364	9691	9691	5	NA	2	NA	NA	1	NA	NA	3	NA	1	NA	NA	NA	NA	NA	NA	NA
BC01	DN	5P	L	3040	611	352	352	2.8	NA	NA	1	NA	NA	NA	NA	NA	NA	NA	NA	NA	NA	NA	NA	NA	NA
BC01	MO	5N	K	104927	4206	1562	1526	5.4	NA	1	NA	NA	NA	NA	NA	1	NA	NA	NA	NA	NA	NA	NA	NA	NA
BC01	MO	5N	L	64493	5942	2227	2198	5.5	NA	NA	NA	NA	NA	NA	NA	2	NA	NA	NA	NA	NA	NA	NA	NA	NA
BC01	MO	5P	K	44899	1978	639	639	4.3	NA	1	NA	NA	NA	NA	NA	NA	NA	NA	NA	NA	NA	NA	NA	NA	NA
BC01	MZ	5N	K	243787	15284	8952	8952	4	NA	6	NA	NA	NA	NA	NA	7	1	NA	NA	NA	NA	NA	NA	NA	NA
BC01	MZ	5N	L	536214	35415	19126	14032	3.7	NA	8	1	NA	NA	NA	NA	2	2	NA	1	NA	NA	NA	NA	NA	NA
BC01	MZ	5P	K	126899	10312	6167	6167	3.1	NA	3	1	NA	NA	NA	NA	10	1	NA	NA	NA	NA	NA	NA	NA	NA
BC01	MZ	5P	L	259954	19428	10803	10803	2.7	NA	8	NA	NA	NA	NA	NA	5	NA	NA	NA	NA	NA	NA	NA	NA	NA
BC01	N	5N	K	495587	20154	12986	12986	0.5	NA	1	6	5	10	NA	1	8	3	NA	NA	NA	NA	NA	NA	NA	NA
BC01	N	5N	L	511827	40560	26746	26746	0.8	1	4	4	6	12	NA	NA	7	5	NA	NA	NA	NA	NA	NA	NA	NA
BC01	N	5P	K	115306	11389	7769	7769	0.1	NA	NA	4	3	7	NA	NA	2	1	1	NA	NA	NA	NA	NA	NA	NA
BC01	N	5P	L	335942	32658	22113	22113	0.1	2	1	18	6	41	NA	1	5	6	1	NA	NA	NA	NA	NA	NA	NA
BC01	SM	5N	K	914738	17075	8260	8248	7.6	NA	5	NA	NA	NA	NA	NA	4	NA	NA	NA	NA	NA	NA	NA	NA	NA
BC01	SM	5N	L	762754	20319	9667	9613	7.6	NA	11	NA	NA	NA	NA	NA	3	NA	NA	NA	NA	NA	NA	NA	NA	NA
BC01	SM	5P	K	22427	1045	607	607	6.1	NA	1	NA	NA	NA	NA	NA	2	NA	NA	NA	NA	NA	NA	NA	NA	NA
BC01	SM	5P	L	27642	1838	690	690	5.8	NA	1	NA	NA	NA	NA	NA	1	NA	NA	NA	NA	NA	NA	NA	NA	NA
BC01	TR	5N	K	53927	3746	2410	2410	0.6	1	1	1	NA	NA	NA	NA	NA	NA	NA	NA	NA	NA	NA	NA	NA	NA
BC01	TR	5N	L	102224	8139	4446	4446	0.6	NA	NA	1	1	3	1	1	NA	NA	NA	NA	NA	NA	NA	NA	NA	NA
BC01	TR	5P	K	56897	3975	2514	2514	0.1	NA	1	1	1	NA	NA	NA	NA	NA	NA	NA	NA	NA	NA	NA	NA	NA
BC01	TR	5P	L	133968	7182	4144	4144	0.2	1	NA	2	1	5	NA	NA	1	NA	NA	NA	NA	NA	NA	NA	NA	NA
BC02	DN	5N	K	168171	21105	5125	5125	3.1	NA	NA	1	NA	3	NA	NA	NA	NA	NA	NA	NA	NA	NA	NA	NA	NA
BC02	DN	5N	L	160568	27333	11049	11049	3.5	NA	5	3	2	2	NA	NA	5	2	NA	NA	NA	NA	NA	NA	NA	NA
BC02	DN	5P	K	21583	2712	480	480	2.2	NA	1	NA	NA	1	NA	NA	NA	NA	NA	NA	NA	NA	NA	NA	NA	NA
BC02	DN	5P	L	20273	4129	791	791	2.6	NA	1	NA	NA	NA	NA	NA	NA	NA	NA	NA	NA	NA	NA	NA	NA	NA
BC02	MO	5N	K	155194	35159	7472	6580	4.5	NA	6	NA	NA	NA	NA	NA	2	NA	NA	NA	NA	NA	NA	NA	NA	NA
BC02	MO	5N	L	75509	28813	10593	9477	4	NA	10	NA	NA	1	NA	NA	9	NA	NA	NA	NA	NA	NA	NA	NA	NA
BC02	MZ	5N	K	187970	76695	24238	24238	3.5	NA	9	NA	NA	1	NA	NA	14	NA	1	NA	NA	NA	NA	NA	NA	NA
BC02	MZ	5N	L	182281	58158	19301	19301	4.4	NA	9	NA	NA	NA	NA	NA	12	NA	NA	NA	NA	NA	NA	NA	NA	NA
BC02	MZ	5P	K	292810	12992	2553	2553	2.4	NA	1	NA	NA	NA	NA	NA	1	NA	1	NA	NA	NA	NA	NA	NA	NA
BC02	N	5N	K	223362	86005	33475	33475	0.2	5	9	16	10	29	2	3	18	4	1	2	1	NA	NA	NA	NA	NA
BC02	N	5N	L	703946	146466	37578	37578	0.3	6	7	25	8	39	1	2	13	6	3	1	NA	2	2	NA	NA	NA
BC02	N	5P	K	174412	62947	23851	23851	0.1	2	1	16	10	27	2	2	12	5	2	1	NA	NA	NA	NA	NA	NA
BC02	N	5P	L	48554	25019	10407	10407	0.2	2	1	6	5	12	1	NA	4	2	NA	NA	NA	NA	NA	NA	NA	NA
BC02	SM	5N	K	315841	63306	21628	18825	6	NA	18	1	NA	1	NA	NA	10	NA	NA	NA	NA	NA	NA	NA	NA	NA
BC02	SM	5N	L	90124	22018	10963	9726	6.2	NA	5	NA	NA	NA	NA	NA	2	NA	NA	NA	NA	NA	NA	NA	NA	NA
BC02	SM	5P	L	2459	1421	582	582	4.7	NA	NA	NA	1	NA	NA	NA	NA	NA	NA	NA	NA	NA	NA	NA	NA	NA
BC02	TR	5N	K	17561	10147	3232	3232	0.8	NA	1	2	1	3	NA	NA	1	NA	NA	NA	NA	NA	NA	NA	NA	NA
BC02	TR	5N	L	12554	6922	3221	3221	0.4	NA	1	1	NA	4	NA	NA	3	2	NA	NA	NA	NA	NA	NA	NA	NA
BC02	TR	5P	K	95815	44273	15577	15577	0.1	1	1	10	4	12	NA	NA	8	3	NA	NA	NA	NA	NA	NA	NA	NA
BC02	TR	5P	L	143174	65068	15224	15224	0.1	2	1	15	1	16	NA	1	2	4	NA	NA	NA	NA	NA	NA	NA	NA
BC03	DN	5N	K	6148	2423	780	780	3.8	NA	NA	1	NA	NA	NA	NA	NA	NA	NA	NA	NA	NA	NA	NA	NA	NA
BC03	DN	5N	L	37363	14468	4601	4601	4.1	NA	3	1	NA	4	NA	NA	1	NA	1	NA	NA	NA	NA	NA	NA	NA
BC03	DN	5P	L	335	280	119	119	0.9	NA	1	NA	NA	NA	NA	NA	NA	NA	NA	NA	NA	NA	NA	NA	NA	NA
BC03	MO	5N	K	14208	5804	1421	1393	6.5	NA	4	NA	NA	NA	NA	NA	NA	NA	NA	NA	NA	NA	NA	NA	NA	NA
BC03	MO	5N	L	94926	20327	2795	2786	6.6	NA	1	NA	NA	NA	NA	NA	NA	NA	NA	NA	NA	NA	NA	NA	NA	NA
BC03	MO	5P	L	6851	2066	297	297	4.2	NA	1	NA	NA	NA	NA	NA	NA	NA	NA	NA	NA	NA	NA	NA	NA	NA
BC03	MZ	5N	K	244012	68052	21365	21365	4.7	NA	12	2	NA	1	NA	NA	10	1	NA	NA	NA	NA	NA	NA	NA	NA
BC03	MZ	5N	L	269676	50739	13857	13857	4.7	NA	14	1	1	1	NA	NA	5	NA	NA	NA	NA	NA	NA	1	NA	NA
BC03	MZ	5P	K	100044	31694	7746	7746	2.8	NA	3	3	NA	4	NA	NA	9	NA	NA	NA	NA	NA	NA	NA	NA	NA
BC03	MZ	5P	L	101105	33483	6334	6334	2.3	NA	5	1	NA	1	NA	NA	2	NA	1	NA	NA	NA	NA	NA	NA	NA
BC03	N	5N	K	624087	141684	49293	49293	0.1	2	2	25	10	35	1	1	15	16	7	1	NA	2	NA	NA	NA	NA
BC03	N	5N	L	672671	122531	37739	37739	0.1	1	2	20	5	30	1	NA	6	8	3	NA	NA	NA	NA	NA	NA	NA
BC03	N	5P	K	214342	67612	24645	24645	0	3	2	15	3	20	1	NA	11	7	3	NA	3	1	NA	NA	NA	NA
BC03	N	5P	L	858505	157966	48992	48992	0.1	1	3	37	10	54	2	1	18	14	2	NA	NA	2	NA	NA	NA	NA
BC03	SM	5N	K	234006	35961	11118	11113	8.8	NA	10	NA	NA	NA	NA	NA	1	NA	NA	NA	NA	NA	NA	NA	NA	NA
BC03	SM	5N	L	330579	44643	12519	12381	8.8	NA	8	NA	NA	1	NA	NA	3	NA	NA	NA	NA	NA	NA	2	NA	NA
BC03	TR	5N	K	13629	8147	3168	3168	0.1	NA	NA	NA	NA	9	1	NA	1	2	NA	NA	NA	NA	NA	1	NA	NA
BC03	TR	5N	L	41189	17905	5402	5402	0.1	1	NA	3	1	11	NA	NA	1	2	NA	NA	NA	NA	NA	NA	NA	NA
BC03	TR	5P	K	4339	3699	1445	1445	0.1	NA	1	NA	NA	NA	NA	NA	NA	1	NA	NA	NA	NA	NA	NA	NA	NA
BC03	TR	5P	L	52258	22724	5135	5135	0	NA	1	1	1	4	NA	NA	NA	1	1	NA	NA	NA	NA	NA	NA	NA
BC04	DN	5N	K	266028	14031	4377	4377	2.3	NA	3	NA	NA	1	NA	NA	4	NA	NA	NA	NA	NA	1	NA	NA	NA
BC04	DN	5N	L	376502	32254	10944	10944	3	NA	2	4	2	5	NA	NA	1	NA	NA	NA	NA	NA	NA	NA	NA	NA
BC04	MO	5N	L	33553	15617	4076	4054	4.8	NA	1	1	NA	NA	NA	NA	1	NA	NA	NA	NA	NA	NA	NA	NA	NA
BC04	MZ	5N	K	347025	69057	20914	20914	3.9	NA	15	3	NA	NA	NA	NA	8	2	1	NA	NA	NA	NA	3	NA	NA
BC04	MZ	5N	L	256664	75959	20233	20233	3.6	NA	13	4	NA	3	NA	NA	7	NA	NA	NA	NA	NA	NA	NA	NA	NA
BC04	MZ	5P	K	144194	36081	10545	10545	2.6	NA	11	2	NA	3	NA	NA	8	NA	NA	NA	NA	NA	NA	NA	NA	NA
BC04	MZ	5P	L	104617	33831	10528	10528	2.2	NA	5	3	1	2	NA	NA	1	1	NA	1	NA	NA	NA	NA	NA	NA
BC04	N	5N	K	856909	163150	63392	63392	0	NA	5	28	10	56	1	1	11	15	2	NA	NA	2	NA	NA	NA	NA
BC04	N	5N	L	775865	172500	63465	63465	0.1	4	12	45	7	54	1	2	14	9	4	5	1	NA	NA	NA	NA	NA
BC04	N	5P	K	931385	153671	57933	57933	0	5	7	31	5	49	2	1	19	15	1	3	NA	NA	NA	NA	NA	NA
BC04	N	5P	L	564898	139709	50779	50779	0	6	5	31	13	49	5	1	8	12	3	5	NA	2	NA	NA	NA	NA
BC04	SM	5N	L	70477	37891	3563	3448	7.2	NA	1	NA	NA	NA	NA	NA	2	NA	NA	NA	NA	NA	NA	NA	NA	NA
BC04	TR	5N	K	188700	36174	13288	13288	0	NA	1	13	5	10	3	NA	1	2	NA	NA	NA	NA	NA	NA	NA	NA
BC04	TR	5N	L	119011	33695	12414	12414	0.1	1	NA	3	4	18	2	NA	2	4	NA	NA	NA	NA	NA	NA	NA	NA
BC04	TR	5P	K	378743	96788	38715	38715	0	2	1	22	6	29	2	NA	9	7	1	NA	NA	2	NA	NA	NA	NA
BC04	TR	5P	L	417680	122824	43354	43354	0	2	8	25	16	49	4	NA	3	5	NA	4	NA	NA	NA	NA	NA	NA
BC05	DN	5N	K	206469	22018	8987	8987	4.6	NA	3	NA	1	NA	NA	NA	NA	1	NA	NA	NA	1	NA	NA	NA	1
BC05	DN	5N	L	242780	9388	4134	4134	4.8	NA	NA	NA	NA	1	NA	NA	1	NA	NA	NA	NA	NA	NA	NA	NA	NA
BC05	MO	5N	K	52689	17831	4899	4776	4.5	NA	2	NA	NA	NA	NA	NA	NA	NA	NA	NA	NA	NA	NA	NA	NA	NA
BC05	MO	5N	L	111062	18032	6226	6133	4	NA	2	NA	NA	NA	NA	NA	1	NA	NA	NA	NA	NA	NA	NA	NA	NA
BC05	MO	5P	K	15656	4910	1107	1107	3.8	NA	1	NA	NA	NA	NA	NA	NA	NA	NA	NA	NA	NA	NA	NA	NA	NA
BC05	MO	5P	L	21655	8598	1946	1946	3.6	NA	1	NA	NA	NA	NA	NA	NA	NA	NA	NA	NA	NA	NA	NA	NA	NA
BC05	MZ	5N	K	296458	25387	12683	12683	3.5	NA	7	1	NA	1	NA	NA	8	NA	NA	NA	NA	NA	NA	2	NA	NA
BC05	MZ	5N	L	330548	32193	14678	14678	3.2	NA	8	NA	NA	1	NA	NA	5	2	NA	NA	NA	NA	NA	1	NA	NA
BC05	MZ	5P	K	140935	21618	8195	8195	2.9	NA	6	NA	NA	NA	NA	NA	3	NA	NA	NA	NA	NA	NA	NA	NA	NA
BC05	MZ	5P	L	148581	22872	10107	10107	2.3	NA	5	NA	NA	NA	NA	NA	1	NA	1	NA	NA	1	NA	NA	NA	NA
BC05	N	5N	K	345478	30812	16743	16743	0.7	1	2	4	NA	4	NA	NA	2	3	NA	1	NA	NA	NA	NA	NA	NA
BC05	N	5N	L	508116	38298	20423	20423	1	NA	NA	7	1	7	NA	NA	10	3	1	NA	NA	NA	NA	NA	NA	NA
BC05	N	5P	K	507058	37021	20038	20038	0.1	NA	2	8	2	8	NA	1	4	1	NA	NA	NA	1	NA	NA	1	NA
BC05	N	5P	L	450734	34807	19092	19092	0.1	4	2	9	3	7	NA	1	2	4	1	1	NA	NA	NA	NA	NA	NA
BC05	SM	5N	K	160622	14591	6828	6790	6.7	NA	2	NA	NA	NA	NA	NA	3	1	NA	NA	NA	NA	NA	NA	NA	NA
BC05	SM	5N	L	186158	17556	7939	7906	6.4	NA	7	NA	NA	1	NA	NA	2	NA	NA	NA	NA	NA	NA	NA	NA	NA
BC05	SM	5P	K	5717	1709	708	708	5.7	NA	1	NA	NA	NA	NA	NA	NA	NA	NA	NA	NA	NA	NA	NA	NA	NA
BC05	TR	5N	K	21681	5353	1574	1574	0.3	NA	NA	2	NA	1	NA	NA	NA	NA	1	NA	NA	NA	NA	NA	NA	NA
BC05	TR	5N	L	20358	5177	1270	1270	0.6	NA	NA	NA	NA	NA	NA	NA	1	1	NA	NA	NA	NA	NA	NA	NA	NA
BC05	TR	5P	K	181941	12953	6785	6785	0.1	NA	1	6	2	5	NA	1	NA	1	NA	NA	NA	NA	NA	NA	NA	NA
BC05	TR	5P	L	158457	19045	9784	9784	0.1	NA	NA	3	3	5	NA	NA	1	2	NA	NA	NA	NA	NA	NA	NA	NA
BC08	DN	5N	K	150326	7082	4063	4063	5	NA	3	NA	NA	1	NA	NA	2	NA	NA	NA	NA	NA	NA	NA	NA	NA
BC08	DN	5N	L	457891	5771	2729	2729	5.5	NA	2	NA	NA	NA	NA	NA	NA	NA	NA	NA	NA	NA	NA	NA	NA	NA
BC08	MO	5N	L	24666	5517	2013	2013	5.1	NA	1	NA	NA	NA	NA	NA	1	1	NA	NA	NA	NA	NA	NA	NA	NA
BC08	MO	5P	K	19198	1632	642	642	4.2	NA	NA	NA	NA	NA	NA	NA	NA	NA	NA	NA	NA	1	NA	NA	NA	NA
BC08	MZ	5N	K	196375	52629	21034	21034	4.1	NA	6	NA	NA	2	NA	NA	10	1	NA	NA	NA	NA	NA	1	NA	1
BC08	MZ	5N	L	123918	29472	12262	12262	3.6	NA	7	1	1	NA	NA	NA	NA	NA	1	NA	NA	NA	NA	NA	NA	NA
BC08	N	5N	K	244979	34942	22824	22824	0.2	4	3	13	NA	17	NA	NA	6	5	1	1	NA	1	NA	NA	NA	NA
BC08	N	5N	L	258616	18033	10974	10974	0.6	NA	NA	5	1	3	1	1	4	5	NA	1	NA	NA	NA	NA	NA	NA
BC08	N	5P	K	445389	29940	18499	18499	0.3	1	1	9	3	13	NA	NA	8	5	NA	NA	NA	NA	NA	NA	NA	NA
BC08	N	5P	L	281435	32230	19952	19952	0.2	4	1	17	2	13	2	1	2	5	3	NA	NA	NA	NA	NA	NA	NA
BC08	SM	5N	K	77998	18548	6888	6888	7.9	NA	5	NA	NA	NA	NA	NA	2	NA	NA	NA	NA	NA	NA	NA	NA	NA
BC08	SM	5N	L	71816	18359	6125	6125	8	NA	7	NA	NA	NA	NA	NA	1	NA	NA	NA	NA	NA	NA	NA	NA	NA
BC08	SM	5P	K	13836	1284	560	560	6.1	NA	1	NA	NA	NA	NA	NA	NA	NA	NA	NA	NA	NA	NA	NA	NA	NA
BC08	SM	5P	L	4515	670	224	224	5.8	NA	2	NA	NA	NA	NA	NA	NA	NA	NA	NA	NA	NA	NA	NA	NA	NA
BC08	TR	5N	K	8573	4633	2923	2923	0.9	NA	2	1	NA	2	NA	NA	NA	NA	NA	NA	NA	NA	NA	NA	NA	NA
BC08	TR	5N	L	22660	4212	1855	1855	1	1	1	1	NA	1	NA	NA	NA	NA	NA	NA	NA	NA	NA	NA	NA	NA
BC08	TR	5P	K	122681	31196	18576	18576	0.2	NA	NA	12	2	20	NA	1	8	4	1	NA	NA	NA	NA	1	NA	NA
BC08	TR	5P	L	151529	11498	4976	4976	0.1	NA	1	3	2	5	NA	1	2	NA	NA	NA	NA	NA	NA	NA	NA	NA
BC09	DN	5N	K	572137	7149	3008	3008	4.7	NA	3	NA	NA	NA	NA	NA	1	1	NA	NA	NA	NA	NA	1	NA	NA
BC09	DN	5N	L	24108	4036	2559	2559	4.5	1	3	NA	NA	NA	NA	NA	NA	NA	1	NA	NA	NA	NA	1	NA	NA
BC09	MO	5N	K	36567	12756	5104	5104	6.7	NA	1	NA	NA	NA	NA	NA	3	NA	NA	NA	NA	NA	NA	3	NA	NA
BC09	MO	5N	L	62858	9234	2890	2890	6	NA	1	NA	NA	NA	NA	NA	NA	NA	NA	NA	NA	NA	NA	NA	NA	NA
BC09	MO	5P	L	30439	2326	1041	1041	4.3	NA	NA	NA	NA	1	NA	NA	1	NA	NA	NA	NA	NA	NA	NA	NA	NA
BC09	MZ	5N	K	230872	43909	20738	20738	4.6	1	7	NA	NA	2	NA	NA	20	NA	NA	NA	NA	NA	NA	4	NA	NA
BC09	MZ	5N	L	13141	11042	9092	9092	4.6	NA	8	1	NA	NA	NA	NA	1	NA	NA	NA	NA	NA	NA	NA	NA	NA
BC09	MZ	5P	K	102886	25346	11153	11153	3.6	NA	5	1	NA	NA	NA	NA	28	2	NA	NA	NA	NA	NA	NA	NA	NA
BC09	MZ	5P	L	400244	48974	11102	11102	3.1	NA	7	1	NA	NA	NA	NA	5	NA	2	NA	NA	NA	NA	NA	NA	NA
BC09	N	5N	K	229524	52329	32704	32704	0.3	NA	1	11	3	20	1	3	15	10	3	1	NA	NA	NA	1	NA	NA
BC09	N	5N	L	50716	30728	20286	20286	0.5	NA	2	13	2	12	NA	NA	4	2	1	1	NA	1	NA	NA	NA	NA
BC09	N	5P	K	345163	104210	67113	67113	0.3	7	2	37	10	43	2	NA	30	17	5	4	1	1	NA	NA	NA	NA
BC09	N	5P	L	140970	50153	25929	25929	0.2	NA	1	14	2	12	3	1	4	4	1	2	NA	1	NA	NA	NA	NA
BC09	SM	5N	K	66234	24175	7295	7295	8.7	NA	2	NA	NA	NA	NA	NA	4	NA	NA	NA	NA	NA	NA	NA	NA	NA
BC09	SM	5N	L	96825	16846	5834	5834	8	NA	3	NA	NA	NA	NA	NA	3	NA	NA	NA	NA	NA	NA	NA	NA	NA
BC09	TR	5N	L	1285	1081	870	870	3.2	NA	NA	NA	NA	1	NA	NA	NA	1	NA	NA	NA	NA	NA	NA	NA	NA
BC09	TR	5P	K	24101	22936	21420	21420	1.2	1	4	10	NA	13	NA	NA	5	7	NA	NA	NA	NA	NA	NA	NA	NA
BC09	TR	5P	L	106574	27582	17548	17548	0.2	NA	3	10	5	14	1	NA	1	3	1	NA	NA	1	NA	NA	NA	NA
BC10	DN	5N	K	55986	11484	5639	5639	4.2	NA	NA	NA	NA	1	NA	NA	3	NA	NA	NA	NA	NA	NA	NA	NA	NA
BC10	DN	5N	L	47863	17835	9829	9829	4.2	NA	2	NA	NA	1	NA	NA	3	NA	NA	NA	NA	NA	NA	NA	NA	NA
BC10	DN	5P	K	1272	1256	1215	1215	3.2	NA	1	NA	NA	NA	NA	NA	NA	NA	NA	NA	NA	NA	NA	NA	NA	NA
BC10	MO	5N	K	15173	8363	4709	4709	5.6	NA	3	NA	NA	NA	NA	NA	NA	NA	NA	NA	NA	NA	NA	NA	NA	NA
BC10	MO	5N	L	167637	14680	7067	7067	4	NA	7	NA	NA	NA	NA	NA	2	NA	NA	NA	NA	NA	NA	NA	NA	NA
BC10	MO	5P	K	116796	11686	3621	3621	3.9	NA	1	NA	NA	NA	NA	NA	1	NA	NA	NA	NA	NA	NA	NA	NA	NA
BC10	MO	5P	L	409011	13409	4260	4260	3.4	NA	6	NA	NA	NA	NA	NA	3	NA	NA	NA	NA	NA	NA	NA	NA	NA
BC10	MZ	5N	K	92464	39141	23795	23795	3.8	NA	21	NA	NA	NA	NA	NA	7	2	NA	NA	NA	NA	NA	1	NA	NA
BC10	MZ	5N	L	69777	39457	27464	27464	3.1	NA	20	NA	NA	1	NA	NA	7	1	NA	1	NA	NA	NA	3	NA	NA
BC10	MZ	5P	K	67829	26788	13368	13368	2.8	NA	9	NA	NA	1	NA	NA	3	NA	NA	NA	NA	NA	NA	3	NA	NA
BC10	MZ	5P	L	247205	29285	15662	15662	2.4	NA	16	1	NA	3	NA	NA	7	3	NA	NA	1	NA	NA	NA	NA	NA
BC10	N	5N	K	61503	24252	18924	18924	0.4	NA	1	4	2	6	NA	2	5	3	1	2	1	NA	NA	NA	NA	NA
BC10	N	5N	L	63267	39561	29899	29899	0.7	2	4	NA	2	11	NA	NA	2	7	NA	1	NA	1	NA	NA	NA	NA
BC10	N	5P	K	96001	38684	28697	28697	0.4	2	2	6	1	9	1	NA	3	4	1	3	NA	NA	NA	NA	NA	NA
BC10	N	5P	L	174938	60240	45904	45904	0.6	2	4	9	6	12	1	1	7	8	10	4	NA	3	NA	NA	NA	NA
BC10	SM	5N	K	20174	12013	7934	7934	7.7	NA	7	NA	NA	NA	NA	NA	NA	NA	NA	NA	NA	NA	NA	NA	NA	NA
BC10	SM	5N	L	177053	16599	8329	8329	7.1	NA	4	NA	NA	NA	NA	NA	1	NA	NA	NA	NA	NA	NA	NA	NA	NA
BC10	TR	5N	K	83264	13565	6977	6977	0.4	NA	2	NA	1	2	NA	NA	2	3	1	NA	1	NA	NA	NA	NA	NA
BC10	TR	5N	L	20857	14005	10743	10743	0.9	NA	2	3	2	1	NA	NA	NA	1	NA	4	NA	NA	NA	NA	NA	NA
BC10	TR	5P	K	76584	44375	30606	30606	0.5	1	1	6	2	11	1	1	7	NA	NA	3	2	NA	NA	NA	NA	NA
BC10	TR	5P	L	138776	43372	17808	17808	0.2	NA	1	5	1	15	2	NA	1	5	2	2	2	NA	NA	NA	NA	NA
BC12	DN	5N	L	172776	4065	1649	1649	3.4	NA	NA	NA	NA	NA	NA	NA	1	1	NA	NA	NA	NA	NA	NA	NA	NA
BC12	DN	5P	K	6804	609	387	387	2	NA	1	NA	NA	NA	NA	NA	NA	NA	NA	NA	NA	NA	NA	NA	NA	NA
BC12	MO	5N	L	494474	19859	6672	6672	5	NA	4	NA	NA	NA	NA	NA	1	NA	NA	NA	NA	NA	NA	NA	NA	NA
BC12	MO	5P	L	785	755	718	718	3.3	NA	2	NA	NA	NA	NA	NA	NA	1	NA	NA	NA	NA	NA	NA	NA	NA
BC12	MZ	5N	K	71690	17775	6401	6401	3.8	NA	4	NA	NA	1	NA	NA	1	NA	NA	NA	NA	NA	NA	NA	NA	NA
BC12	MZ	5N	L	186724	55203	27889	27889	3.4	NA	20	NA	1	NA	NA	NA	13	NA	1	NA	NA	NA	NA	NA	NA	NA
BC12	MZ	5P	K	164127	42489	20151	20151	3.2	NA	10	1	1	2	NA	NA	9	2	NA	NA	NA	NA	NA	1	NA	NA
BC12	MZ	5P	L	178545	35357	19223	19223	2.5	NA	17	2	1	NA	NA	NA	7	NA	NA	NA	1	NA	NA	1	NA	NA
BC12	N	5N	K	570191	72536	36061	36061	0.3	NA	3	6	6	20	NA	2	4	6	4	2	NA	1	NA	NA	NA	NA
BC12	N	5N	L	213315	51889	31289	31289	0.4	NA	8	3	2	20	NA	NA	1	6	NA	3	NA	NA	NA	NA	NA	NA
BC12	N	5P	K	578346	53950	32178	32178	0.2	2	2	2	4	31	NA	2	7	7	6	NA	NA	NA	NA	NA	NA	NA
BC12	N	5P	L	240550	56697	35591	35591	0.2	1	2	5	2	19	NA	1	7	9	4	NA	2	1	NA	NA	NA	NA
BC12	SM	5N	L	497638	22899	7188	7188	6.1	NA	4	NA	NA	1	NA	NA	2	NA	NA	NA	NA	NA	NA	NA	NA	NA
BC12	TR	5N	K	29385	4194	2212	2212	2.2	NA	1	NA	1	NA	NA	NA	NA	NA	NA	NA	NA	NA	NA	NA	NA	NA
BC12	TR	5P	K	882	875	872	872	2	NA	NA	NA	NA	2	NA	NA	1	NA	NA	NA	NA	NA	NA	NA	NA	NA
BC12	TR	5P	L	156344	47285	26942	26942	0.2	2	3	4	1	23	NA	NA	2	7	2	4	NA	NA	1	NA	NA	NA
